# Supplementary material for: Untargeted Metabolome Analysis of Alcohol-Exposed Pregnancies Reveals Metabolite Differences That Are Associated with Infant Birth Outcomes
Source: MDPI journal article supplement (doi:10.3390/nu14245367), 2022-12-17
Supplement: s1 [file s1]

# Untargeted Metabolome Analysis of Alcohol-Exposed Pregnancies Reveals Metabolite Differences that Are Associated with Infant Birth Outcomes

## Supplemental Material

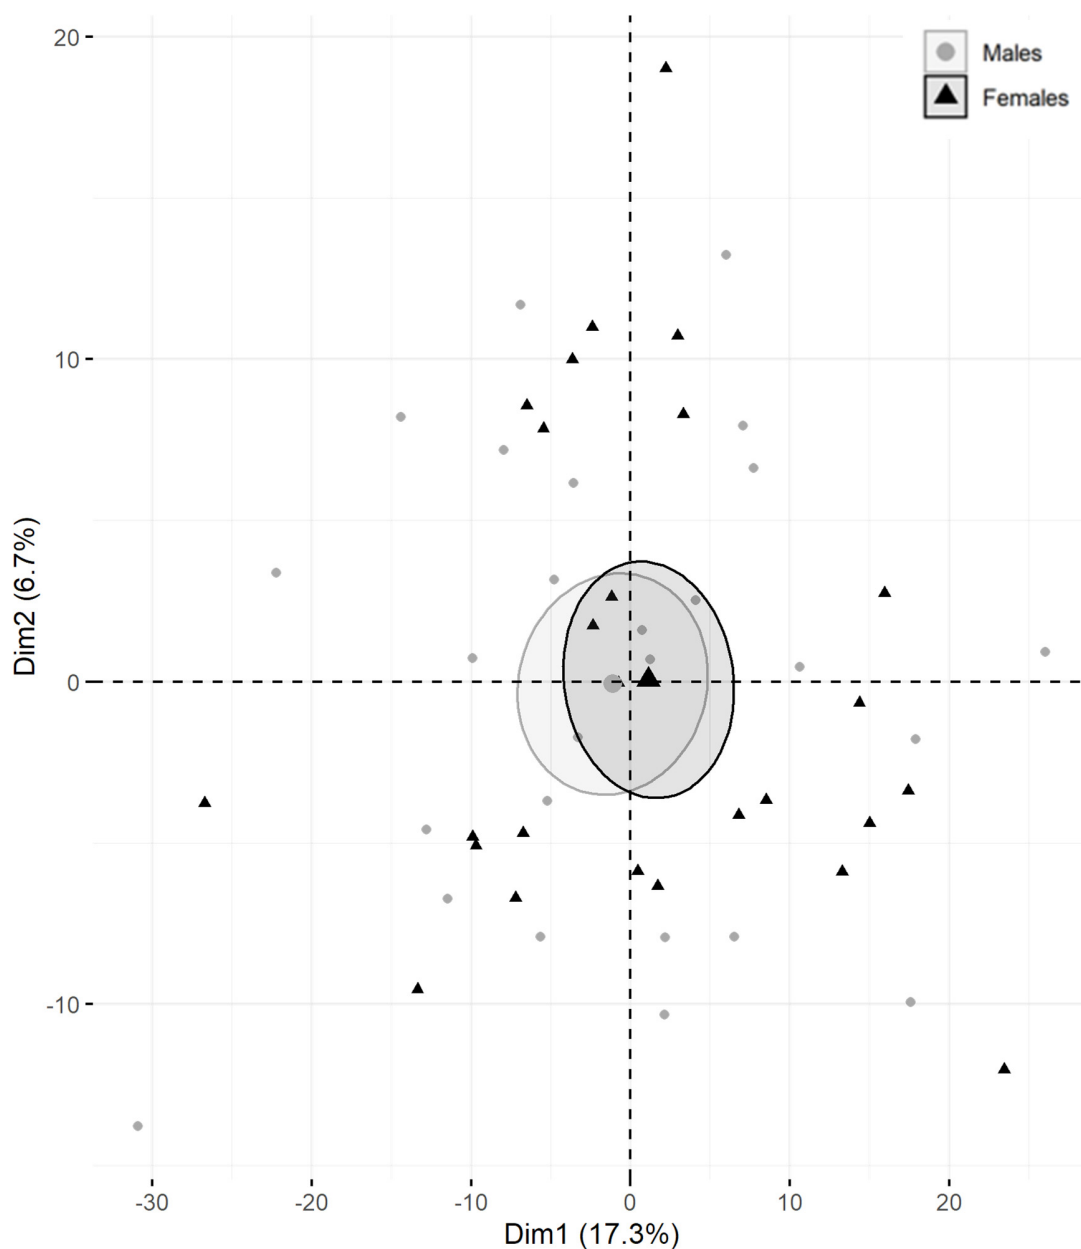

**Figure S1.** Principal Component Analysis (PCA) of 782 Metabolites by Infant Sex ( $n=52$ ). Gray circles denote male offspring. Black triangles denote female offspring.

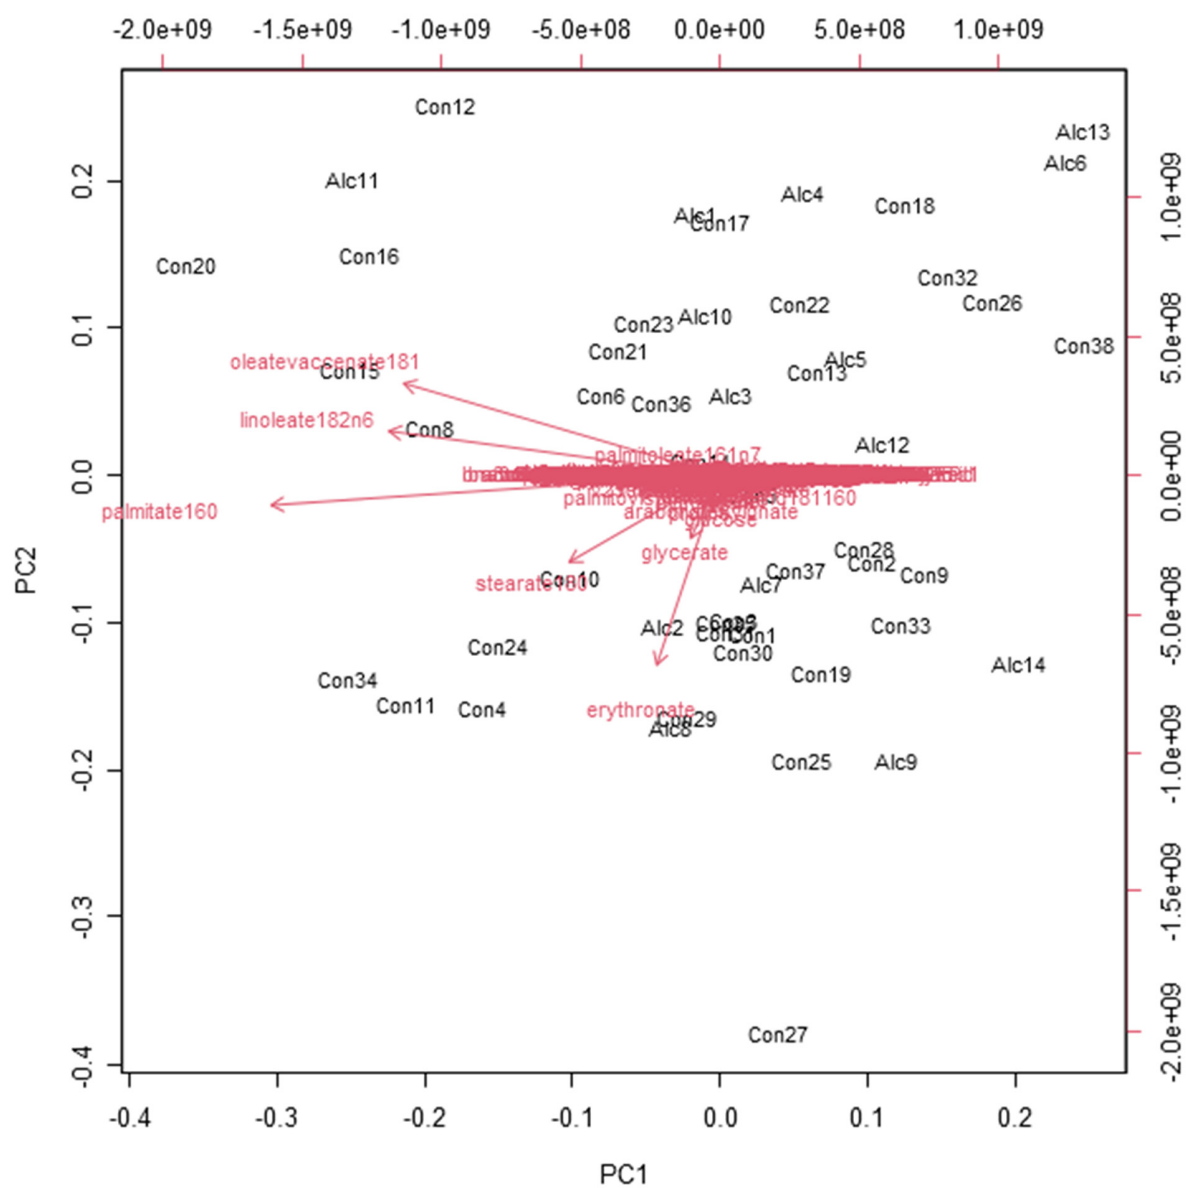

**Figure S2.** Principal Component Analysis (PCA) Biplot

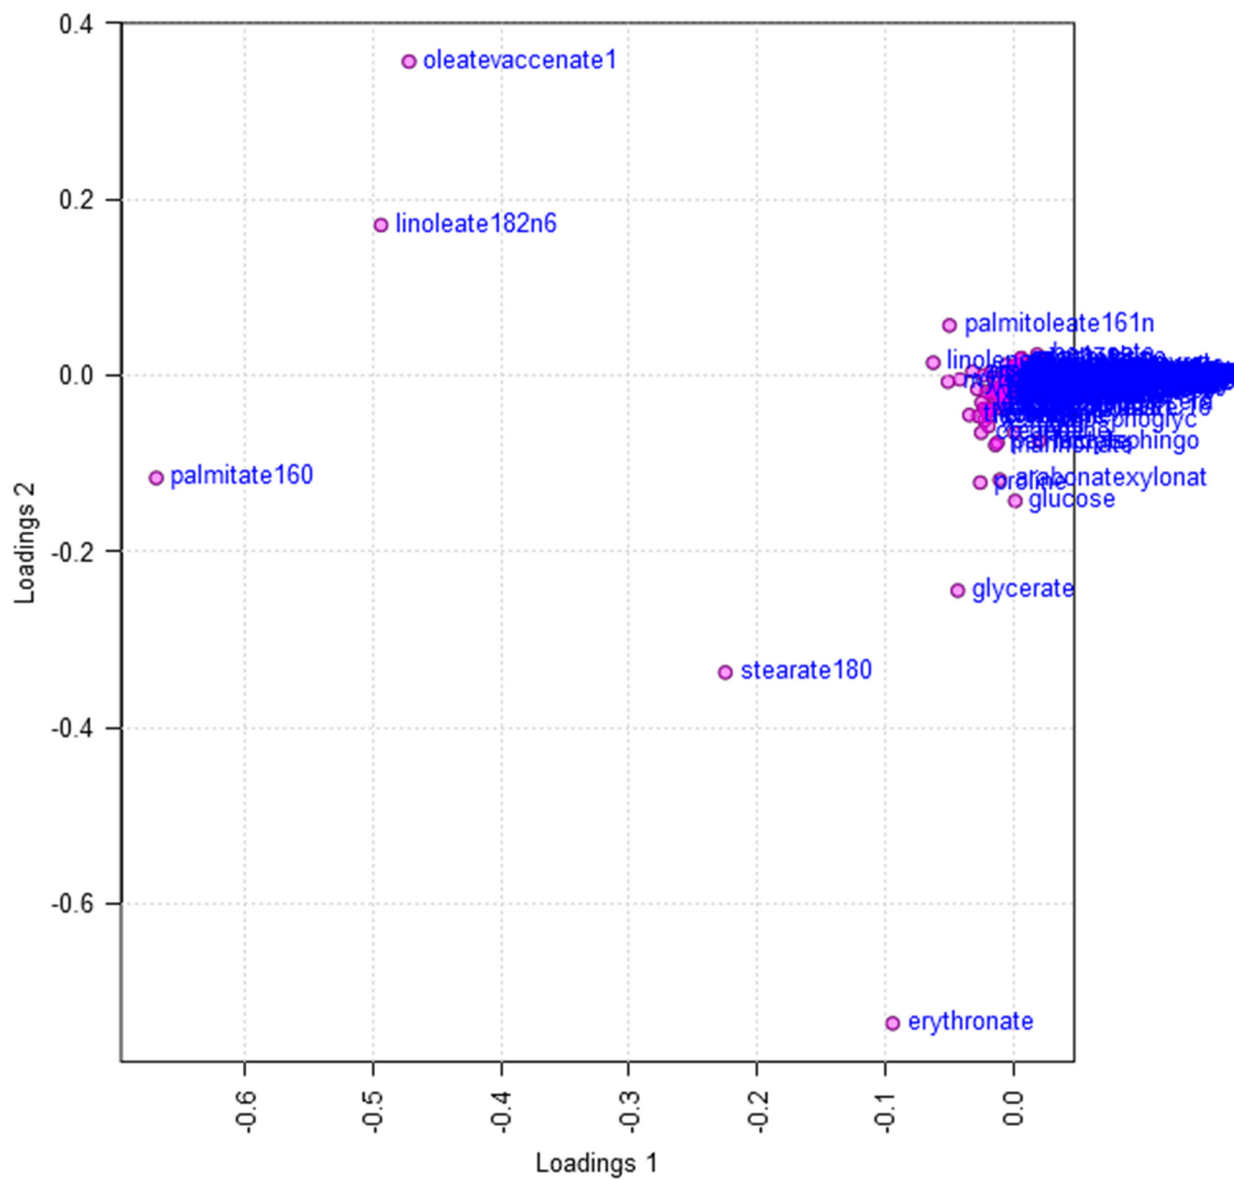

**Figure S3.** Principal Component Analysis (PCA) Loading Plot

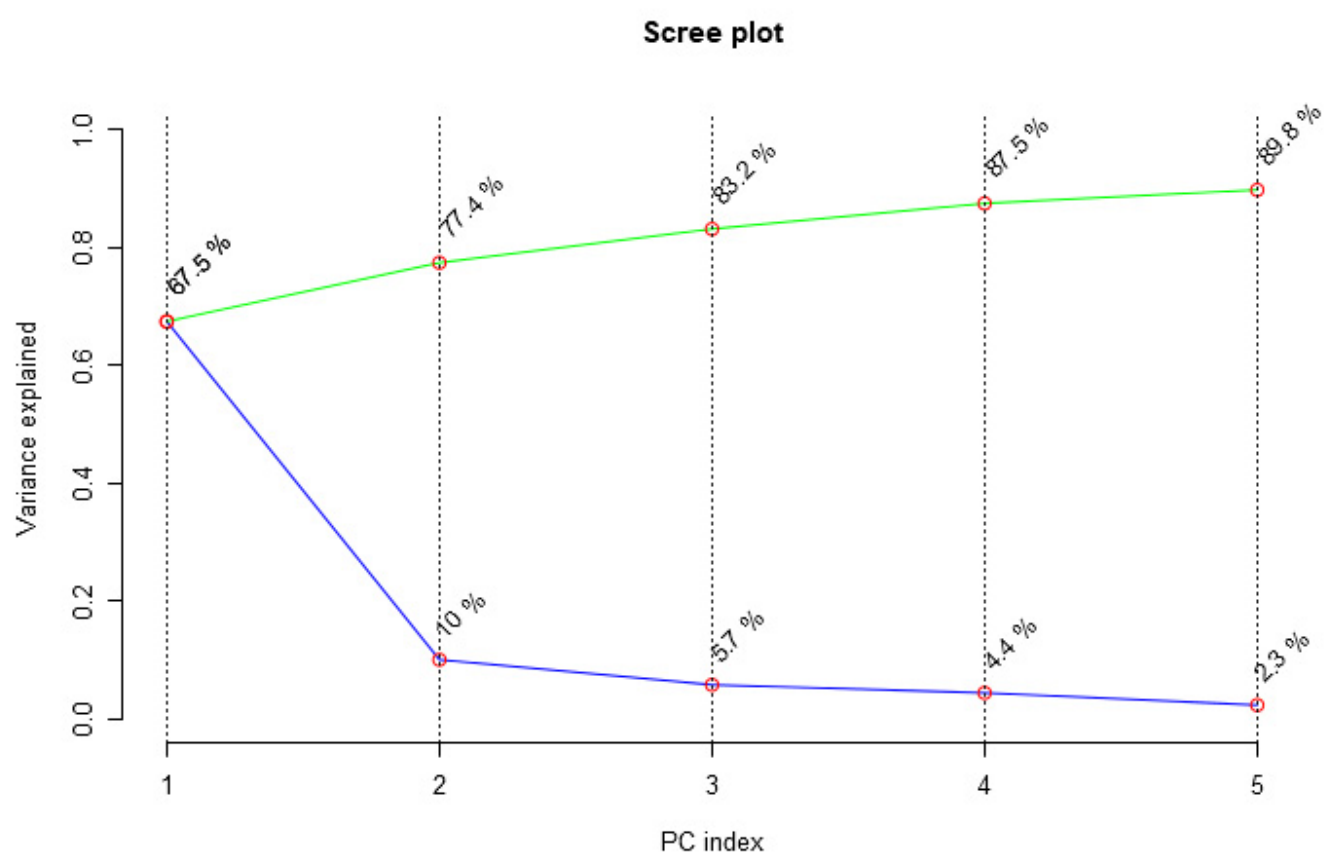

**Figure S4.** Principal Component Analysis (PCA) Scree Plot

a) Infant Birth Length

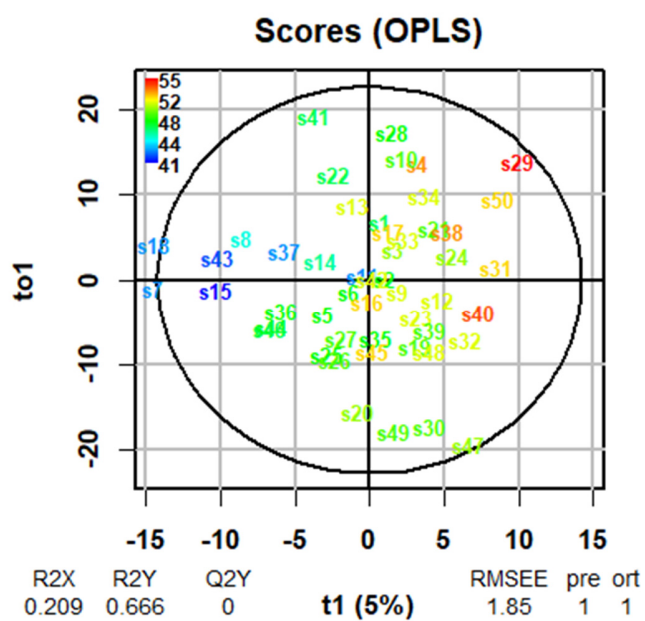

b) Infant Birth Weight

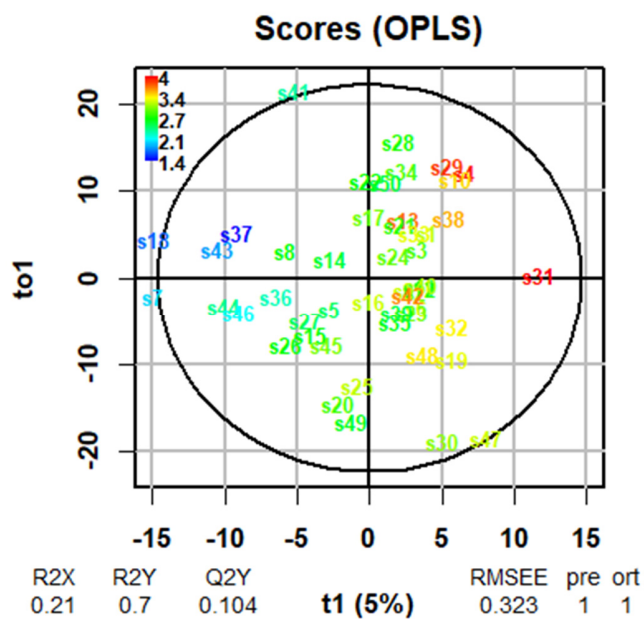

c) Infant Birth Head Circumference

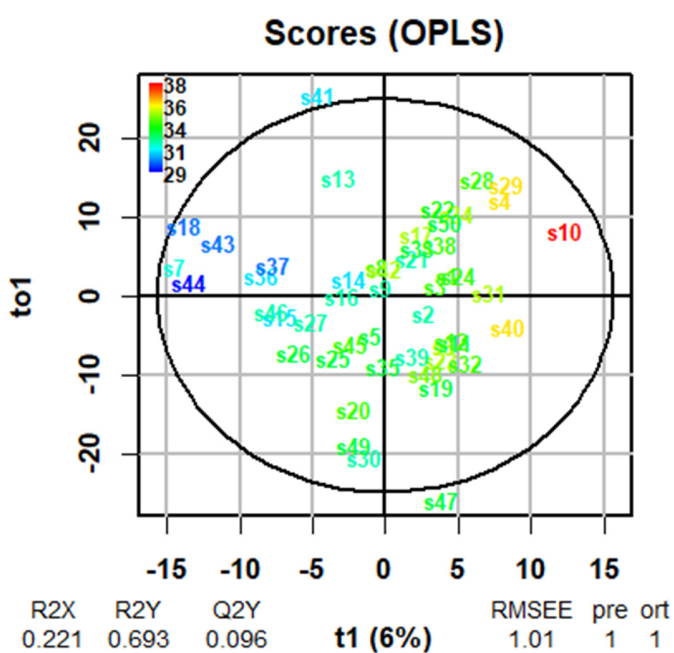

**Figure S5.** oPLS-DA Plots: a) infant birth length; b) infant birth weight; c) infant birth head circumference (OFC)

Table S1. Top 30 Metabolites Loading on PC1

| Metabolite                                 | PC1 Loading |
|--------------------------------------------|-------------|
| palmitate (16:0)                           | -0.66919    |
| linoleate (18:2n6)                         | -0.49372    |
| oleate/vaccenate (18:1)                    | -0.47183    |
| stearate (18:0)                            | -0.22477    |
| erythronate                                | -0.094114   |
| linolenate [alpha or gamma; (18:3n3 or 6)] | -0.062449   |
| myristate (14:0)                           | -0.05094    |
| palmitoleate (16:1n7)                      | -0.049739   |
| glycerate                                  | -0.043289   |
| 13-HODE + 9-HODE                           | -0.041659   |
| threonate                                  | -0.034225   |
| arachidonate (20:4n6)                      | -0.031866   |
| 1-palmitoyl-2-oleoyl-GPC (16:0/18:1)       | -0.028133   |
| isoleucine                                 | -0.027176   |
| proline                                    | -0.025723   |
| creatine                                   | -0.024977   |
| leucine                                    | -0.02468    |
| 5-oxoproline                               | -0.022927   |
| laurate (12:0)                             | -0.022821   |
| 2,3-diphosphoglycerate                     | -0.022443   |
| 1-palmitoyl-2-linoleoyl-GPC (16:0/18:2)    | -0.020905   |
| valine                                     | -0.020764   |
| lactate                                    | 0.020177    |
| X-21796                                    | -0.019337   |
| creatinine                                 | -0.019283   |
| benzoate                                   | 0.018692    |
| 1-palmitoyl-GPC (16:0)                     | -0.017483   |
| choline                                    | -0.017385   |
| margarate (17:0)                           | -0.016828   |
| phosphate                                  | -0.015233   |

Table S2. Top 30 Metabolites Loading on PC2

| Metabolite                           | PC2 Loading |
|--------------------------------------|-------------|
| erythronate                          | -0.73632    |
| oleate/vaccenate (18:1)              | 0.3564      |
| stearate (18:0)                      | -0.33767    |
| glycerate                            | -0.24458    |
| glucose                              | -0.14277    |
| proline                              | -0.12188    |
| arabonate/xylonate                   | -0.11883    |
| palmitate (16:0)                     | -0.11669    |
| mannonate                            | -0.079249   |
| palmitoyl sphingomyelin (d18:1/16:0) | -0.076379   |
| lactate                              | -0.074887   |
| betaine                              | -0.0654     |
| creatine                             | -0.065166   |
| X-21796                              | -0.057841   |
| 2,3-diphosphoglycerate               | -0.051236   |
| isoleucine                           | -0.046392   |
| creatinine                           | -0.046322   |
| threonate                            | -0.045161   |
| valine                               | -0.039162   |
| 1-palmitoyl-GPC (16:0)               | -0.039058   |
| p-cresol sulfate                     | -0.038733   |
| adenosine 5'-monophosphate (AMP)     | -0.038565   |
| 5-oxoproline                         | -0.037776   |
| caproate (6:0)                       | -0.033666   |
| 3-phosphoglycerate                   | -0.032251   |
| leucine                              | -0.0309     |
| carnitine                            | -0.026464   |
| phosphate                            | -0.023961   |
| arachidate (20:0)                    | -0.023829   |
| alanine                              | -0.022703   |
